# Supplementary material for: pH-dependent formation of different coordination cages based on Co4-TC4A secondary building units and bridging ligands
Source: Royal Society of Chemistry journal article supplement (doi:10.1039/c6ce00028b), 2016-01-01
Supplement: c6ce00028b1.pdf [file c6ce00028b1.pdf]

## Supporting Information

### **pH-dependent formation of different coordination cages based on Co<sub>4</sub>-TC4A secondary building units and bridging ligands**

Xinxin Hang<sup>a, b</sup>, Shentang Wang<sup>a, b</sup>, Xiaofei Zhu<sup>a</sup>, Haitao Han<sup>a, b</sup>, Wuping Liao<sup>a, \*</sup>

<sup>a</sup>State Key Laboratory of Rare Earth Resource Utilization, ERC for the Separation and Purification of REs and Thorium, Changchun Institute of Applied Chemistry, Chinese Academy of Sciences, Changchun 130022, China.

<sup>b</sup>University of Chinese Academy of Sciences, Beijing, 100049, China.

1. The SQUEEZE results for CIAC-117-CIAC-120
2. Fig. S1. Molecular structure of cage CIAC-117
3. Fig. S2. Molecular structure of cage CIAC-118
4. Fig. S3 The cage containing six quadrilateral portals on the edge of the face-capped tetrahedral CIAC-117
5. Fig. S4 Molecular structure of CIAC-119
6. Fig. S5 Molecular structure of CIAC-120
7. Fig. S6. Comparison of molecular structures of CIAC-201 and CIAC-118
8. Fig. S7. MALDI-TOF mass spectrometry of the resulting solutions presented the feature peaks of the tetrahedral CIAC-117
9. Fig. S8. MALDI-TOF mass spectrum of the resulting solutions presenting the feature peaks of truncated octahedral coordination cage CIAC-118
10. Fig. S9. MALDI-TOF mass spectrometry of the resulting solutions presented the feature peaks of the tetrahedral CIAC-119
11. Fig. S10. MALDI-TOF mass spectrum of the resulting solutions presenting the feature peaks of truncated octahedral coordination cage CIAC-120
12. Fig. S11. TGA-DSC curves of CIAC-117 exhibiting the weight loss in the temperature ranges 20-800 °C
13. Fig. S12. TGA-DSC curves of CIAC-118 exhibiting the weight loss in the temperature

ranges 20-800 °C

14. Fig. S13. TGA-DSC curves of CIAC-119 exhibiting the weight loss in the temperature ranges 20-800 °C
15. Fig. S14. TGA-DSC curves of CIAC-120 exhibiting the weight loss in the temperature ranges 20-800 °C
16. Fig. S15. FT-IR spectra of the compound CIAC-117- CIAC-120
17. Fig. S16. TG curves of as-synthesized CIAC-117, CIAC-117-a and CIAC-117-b
18. Fig. S17. N<sub>2</sub> adsorption isotherms at 77 K of CIAC-118 and CIAC-120
19. Fig. S18. Removal efficiency of MB over CIAC-120
20. Fig. S19. Removal efficiency of RhB over CIAC-120
21. Fig. S20. Photographs of the color change of the mixed dyes MB/RhB solutions before and after adsorption experiments at given intervals with CIAC-120
22. Fig. S21 Solid-state UV-Vis spectra of MB/RhB@CIAC-120
23. Table S1. Crystal data and structure refinement for compounds CIAC-117-CIAC-120 without the involved solvent molecules

### The SQUEEZE results for CIAC-117-CIAC-120

The disordered solvent molecules and counter cations in the voids in/between the cages cannot be located from Difference Fourier maps. Therefore, the data were treated by PLATON/SQUEEZE to estimate the contribution of these disordered groups [1].

SQUEEZE results for these four compounds are as follows:

#### (1) CIAC-117

```
loop_
  _platon_squeeze_void_nr
  _platon_squeeze_void_average_x
  _platon_squeeze_void_average_y
  _platon_squeeze_void_average_z
  _platon_squeeze_void_volume
  _platon_squeeze_void_count_electrons
  _platon_squeeze_void_content
  1 -0.008 0.000 -0.009      19197      5446 ''
```

#### (2) CIAC-118

```
loop_
  _platon_squeeze_void_nr
  _platon_squeeze_void_average_x
  _platon_squeeze_void_average_y
  _platon_squeeze_void_average_z
  _platon_squeeze_void_volume
  _platon_squeeze_void_count_electrons
  _platon_squeeze_void_content
  1 0.000 0.000 0.000      10      15 ''
  2 0.000 0.000 0.500      772      298 ''
  3 -0.049 0.247 -0.081      7523      2368 ''
  4 0.500 0.500 0.000      772      298 ''
  5 0.500 0.500 0.500      10      15 ''
```

#### (3) CIAC-119

```
loop_
  _platon_squeeze_void_nr
  _platon_squeeze_void_average_x
  _platon_squeeze_void_average_y
  _platon_squeeze_void_average_z
  _platon_squeeze_void_volume
  _platon_squeeze_void_count_electrons
  _platon_squeeze_void_content
  1 -0.005 0.000 -0.005      15881      4778 ''
```

#### (4) CIAC-120

```
loop_
  _platon_squeeze_void_nr
  _platon_squeeze_void_average_x
```

|   | <u>_platon_squeeze_void_average_y</u> | <u>_platon_squeeze_void_average_z</u> | <u>_platon_squeeze_void_volume</u> | <u>_platon_squeeze_void_count_electrons</u> | <u>_platon_squeeze_void_content</u> |
|---|---------------------------------------|---------------------------------------|------------------------------------|---------------------------------------------|-------------------------------------|
| 1 | 0.000                                 | 0.000                                 | 0.000                              | 819                                         | 221 ''                              |
| 2 | 0.000                                 | 0.000                                 | 0.500                              | 23                                          | 0 ''                                |
| 3 | -0.050                                | 0.254                                 | 0.424                              | 7083                                        | 1323 ''                             |
| 4 | 0.500                                 | 0.500                                 | 0.500                              | 819                                         | 221 ''                              |
| 5 | 0.500                                 | 0.500                                 | 0.000                              | 23                                          | 0 ''                                |

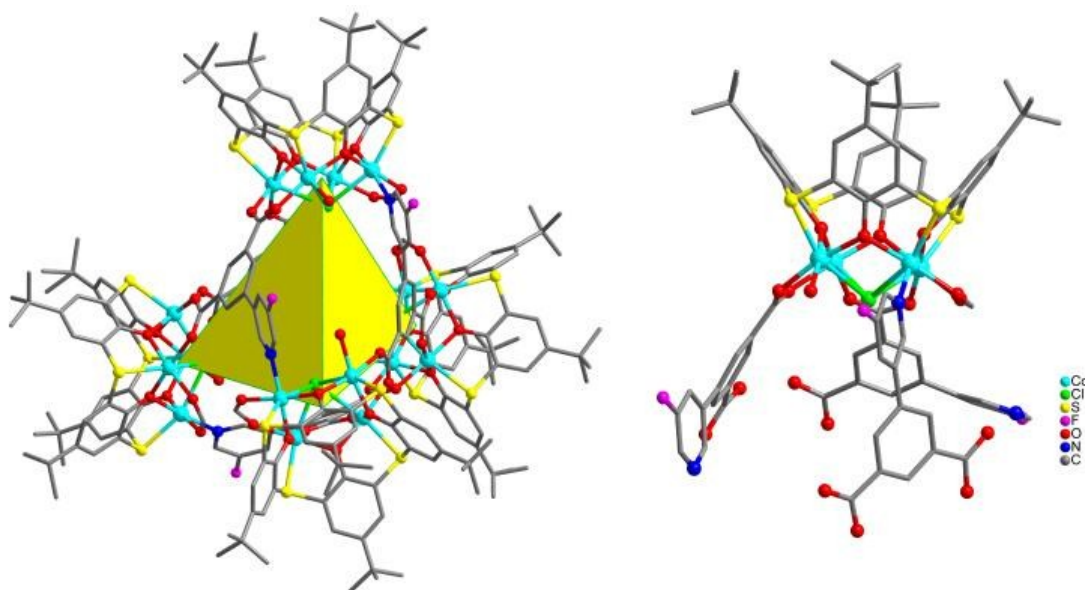

**Fig. S1.** Molecular structure of cage **CIAC-119** (left) as well as connection modes of the shuttlecock-like SBU (right).

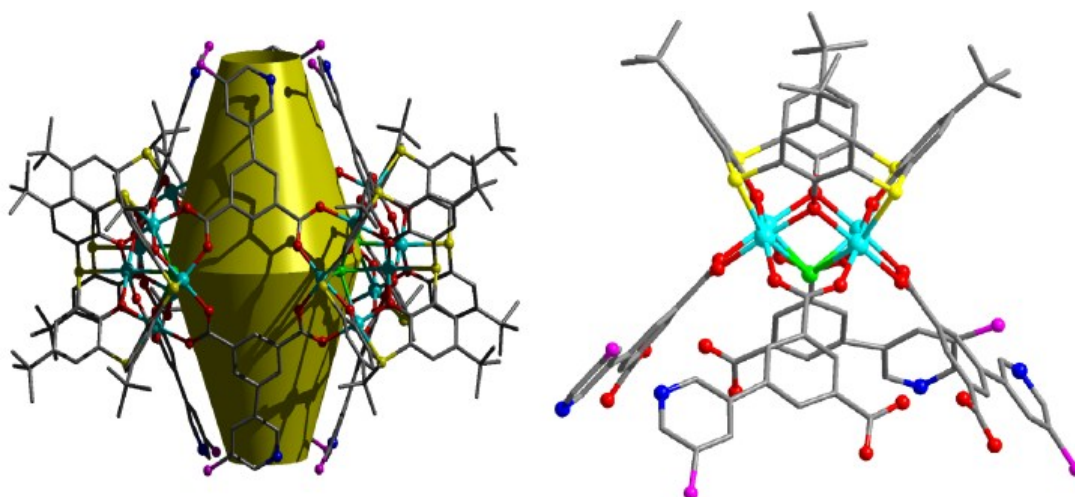

**Fig. S2.** Molecular structure of cage **CIAC-120** (left) as well as connection modes of the shuttlecock-like SBU (right).

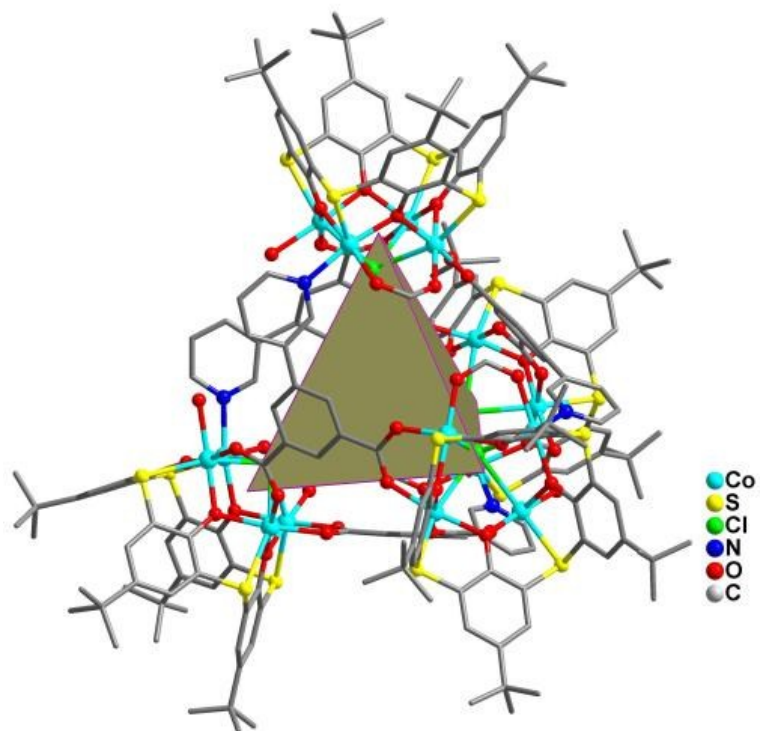

**Fig. S3** Six portals on the edge of the facet-capped tetrahedron CIAC-117.

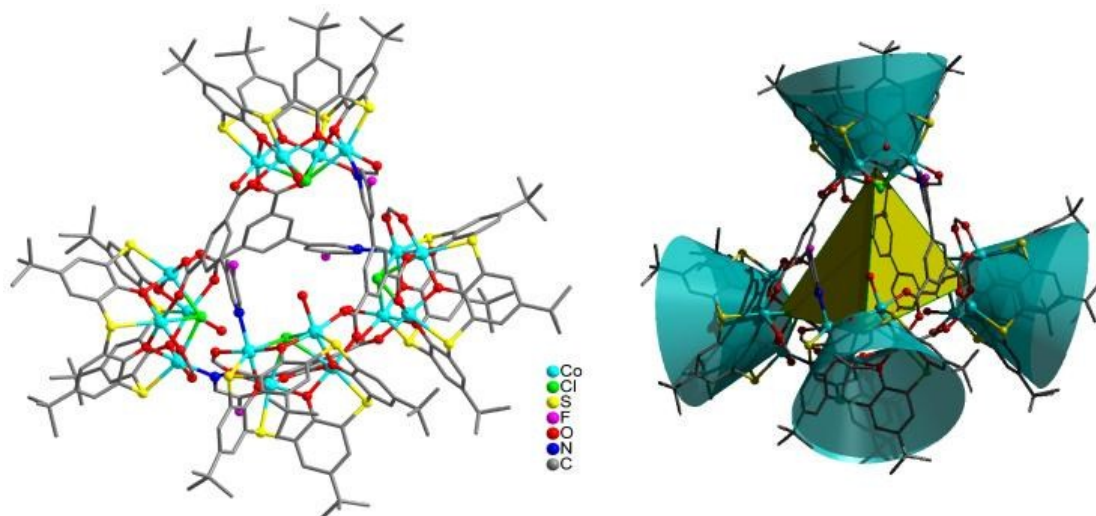

**Fig. S4** Molecular structure of CIAC-119.

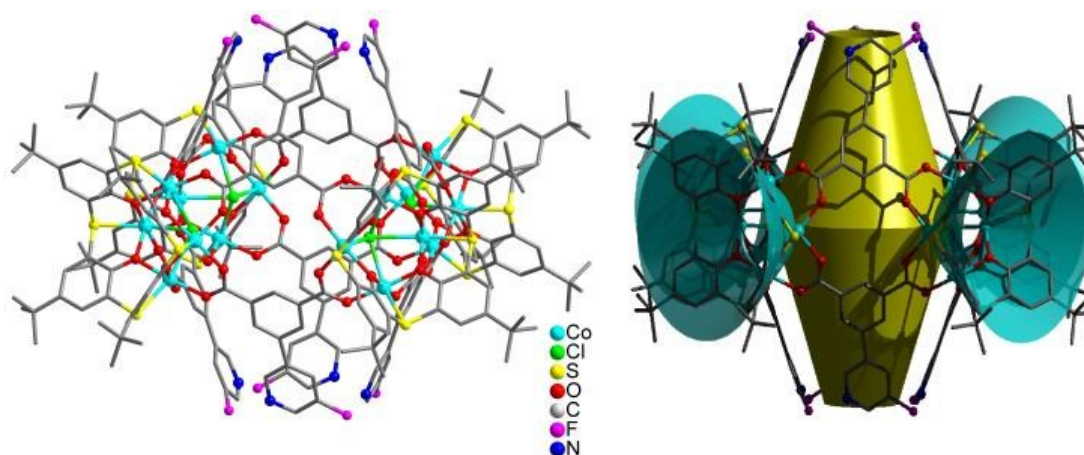

Fig. S5 Molecular structure of CIAC-120.

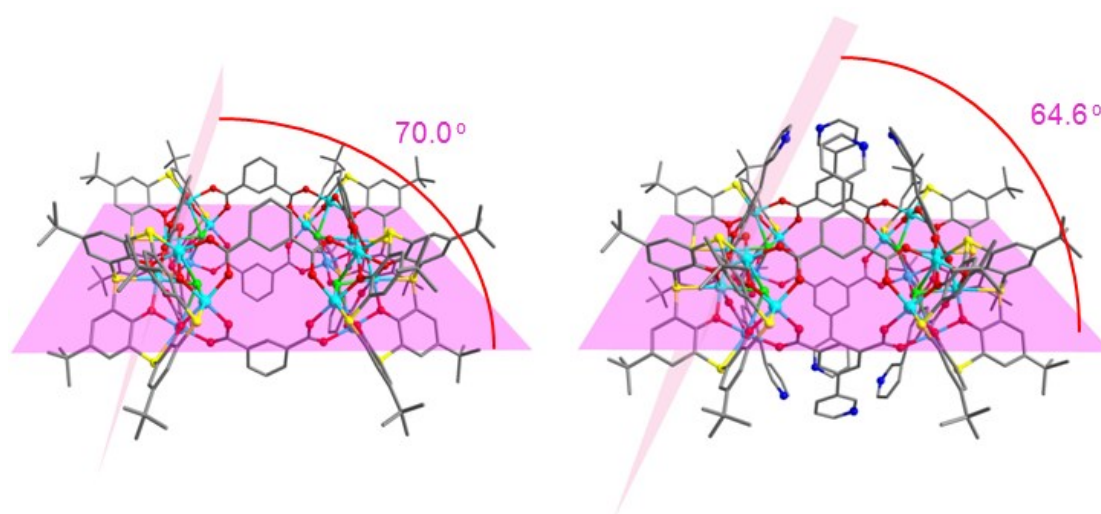

Fig. S6. Comparison of molecular structures of CIAC-201(left) and CIAC-118 (right).

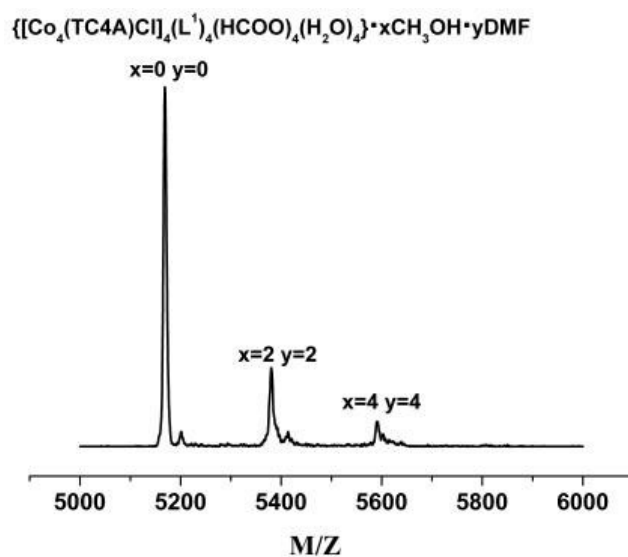

Fig. S7. MALDI-TOF mass spectrum of the resulting solutions presenting the feature peaks of  $\{[\text{Co}_4(\text{TC4A})\text{Cl}]_4(\text{L}^1)_4(\text{HCOO})_4(\text{H}_2\text{O})_4\}$  assembly in CIAC-117.

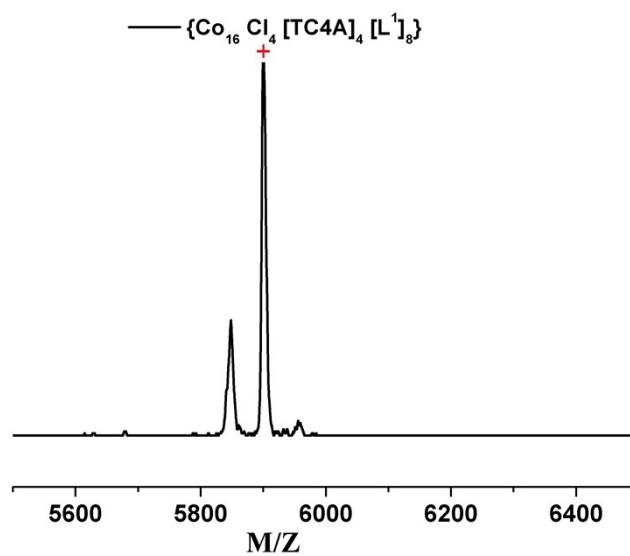

**Fig. S8.** MALDI-TOF mass spectrum of the resulting solutions presenting the feature peaks of  $\{[Co_{16}Cl_4[TC4A]_4[L^1]_8]\}$  assembly in **CIAC-118**.

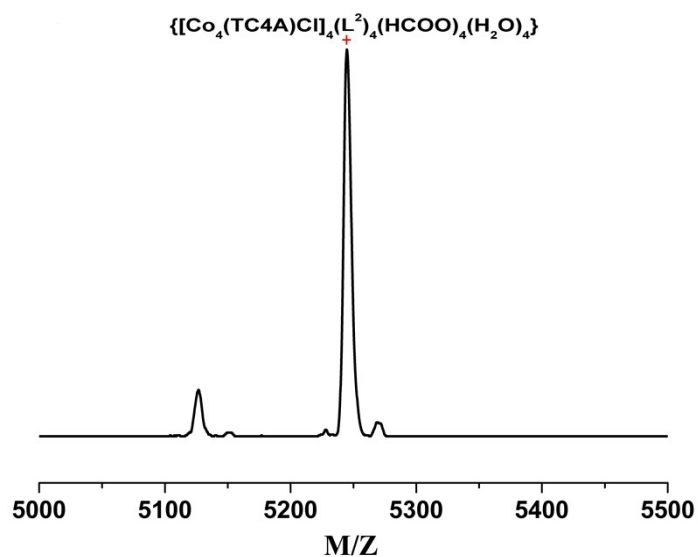

**Fig. S9.** MALDI-TOF mass spectrum of the resulting solutions presenting the feature peaks of  $\{[Co_4(TC4A)Cl_4(L^2)_4(HCOO)_4(H_2O)_4]\}$  assembly in **CIAC-119**.

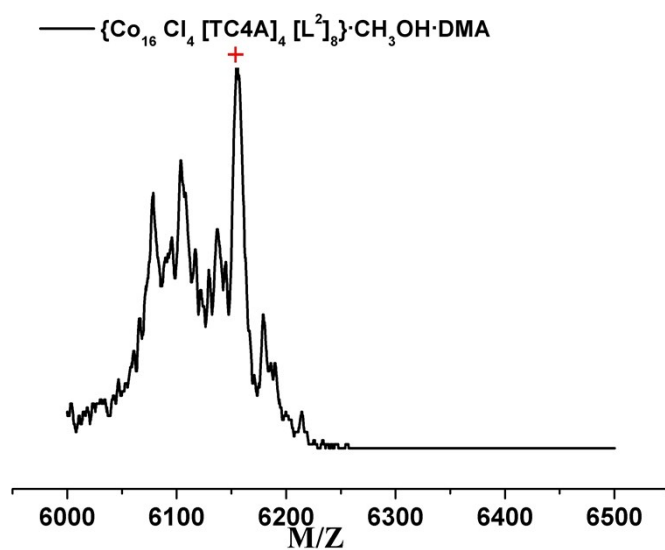

**Fig. S10.** MALDI-TOF mass spectrum of the resulting solutions presenting the feature peaks of  $\{Co_{16} Cl_4 [TC4A]_4 [L^2]_8\}$  assembly in **CIAC-120**.

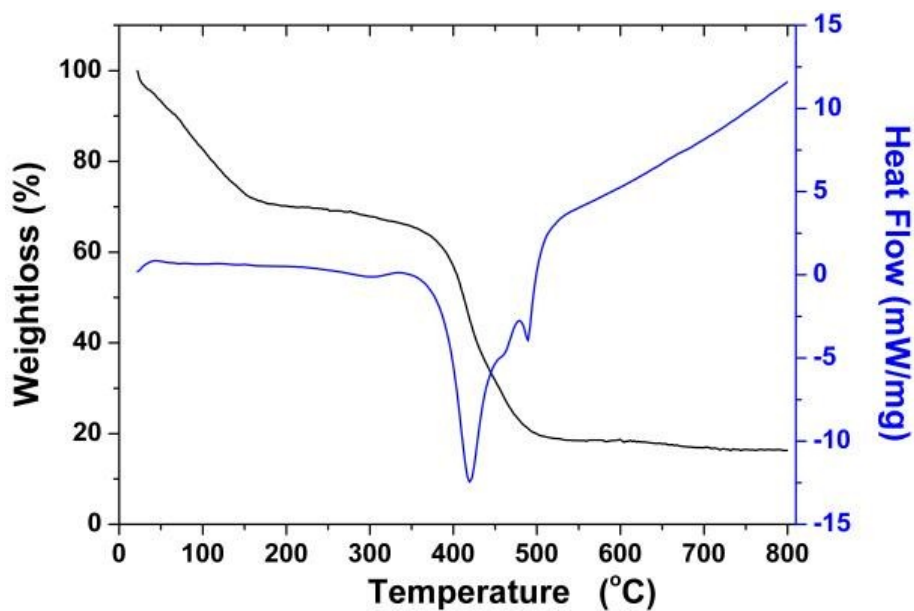

**Fig. S11.** TGA-DSC curves of **CIAC-117** exhibiting the weight loss in the temperature ranges 20-800 °C.



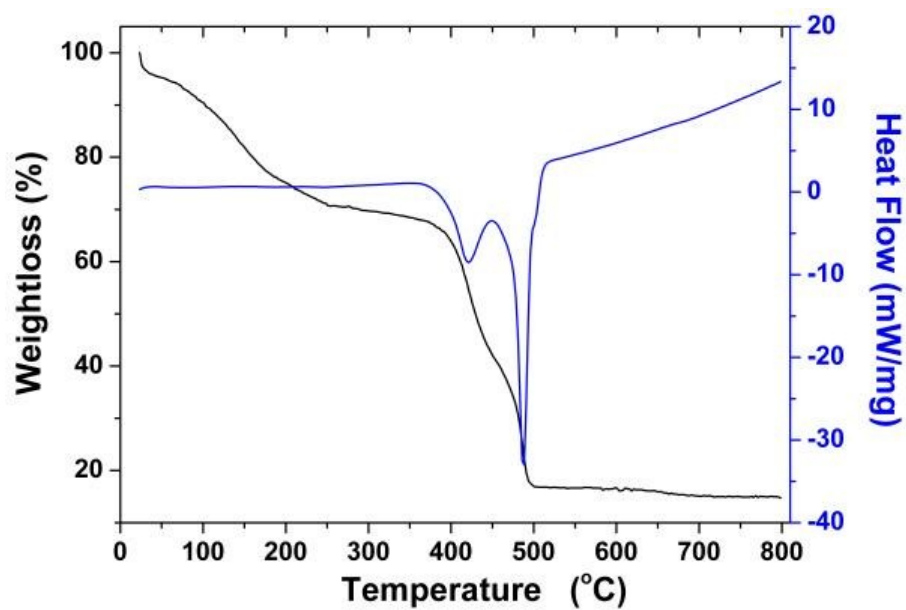

**Fig. S12.** TGA-DSC curves of **CIAC-118** exhibiting the weight loss in the temperature ranges 20-800 °C.

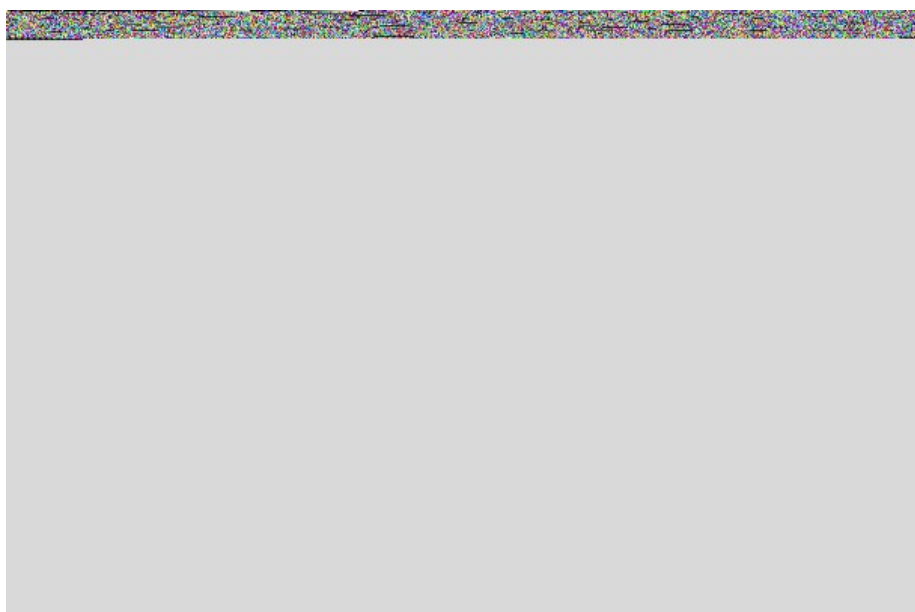

**Fig. S13.** TGA-DSC curves of **CIAC-119** exhibiting the weight loss in the temperature ranges 20-800 °C.

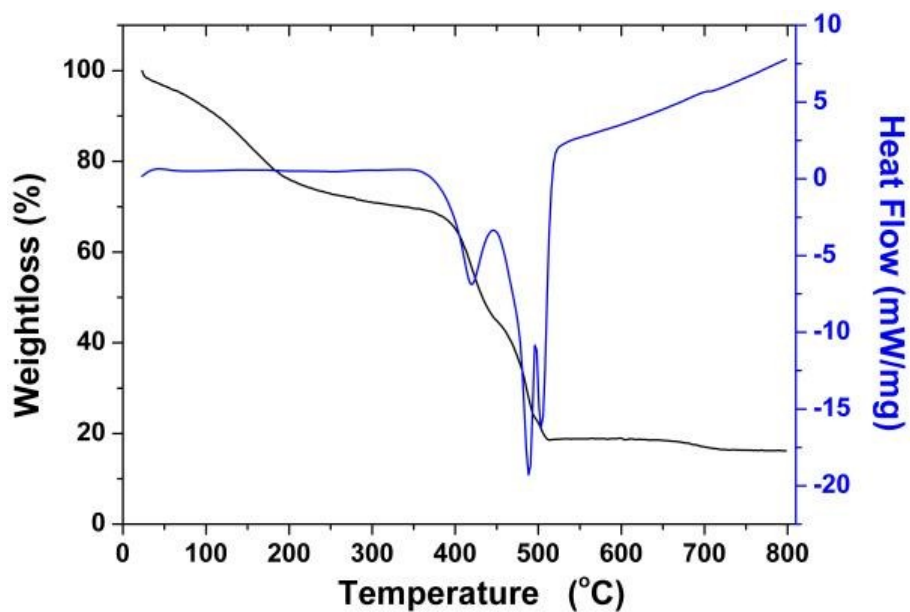

Fig. S14. TGA-DSC curves of CIAC-120 exhibiting the weight loss in the temperature ranges 20-800 °C.

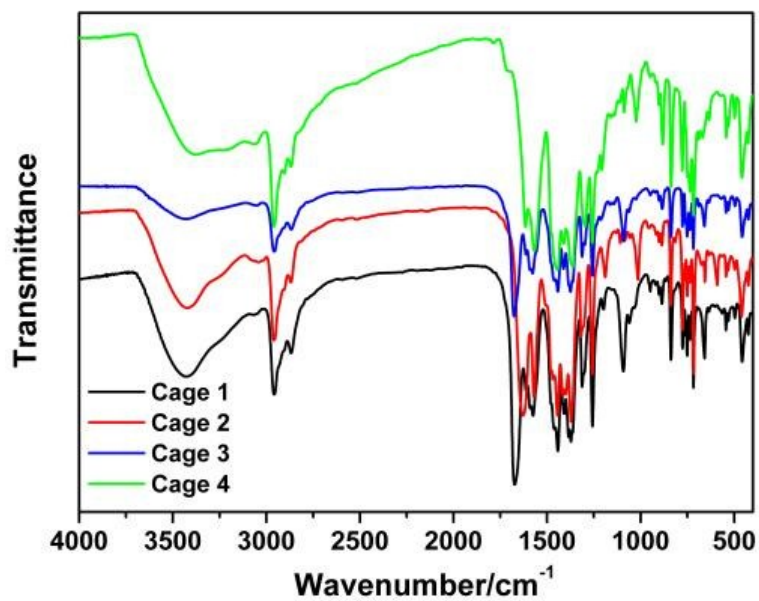

Fig. S15. FT-IR spectra of the compounds CIAC-117- CIAC-120.

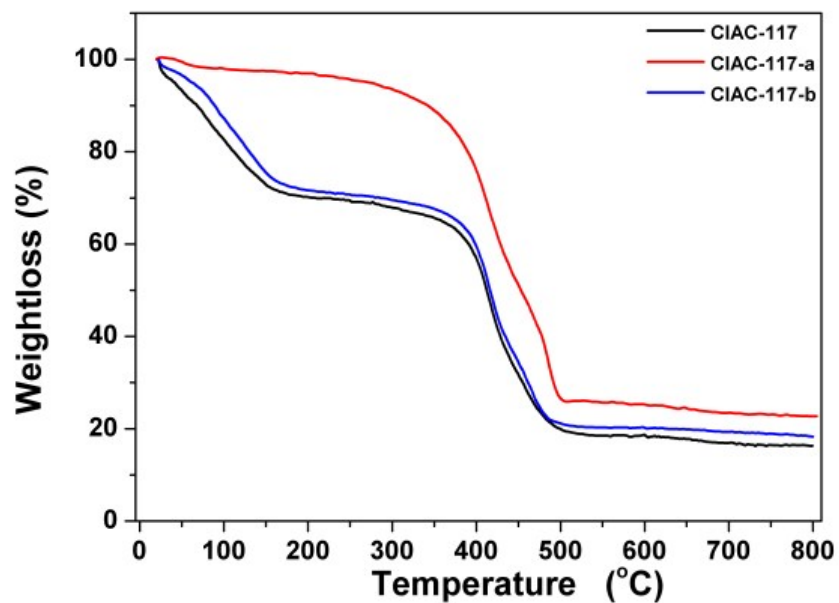

Fig. S16. TG curves of as-synthesized CIAC-117, CIAC-117-a and CIAC-117-b.

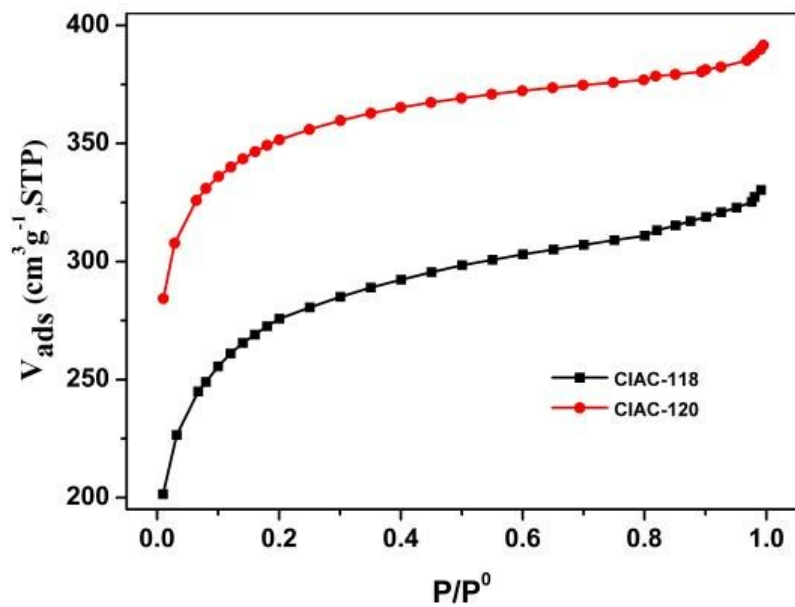

Fig. S17. N<sub>2</sub> adsorption isotherms at 77 K of CIAC-118 and CIAC-120.

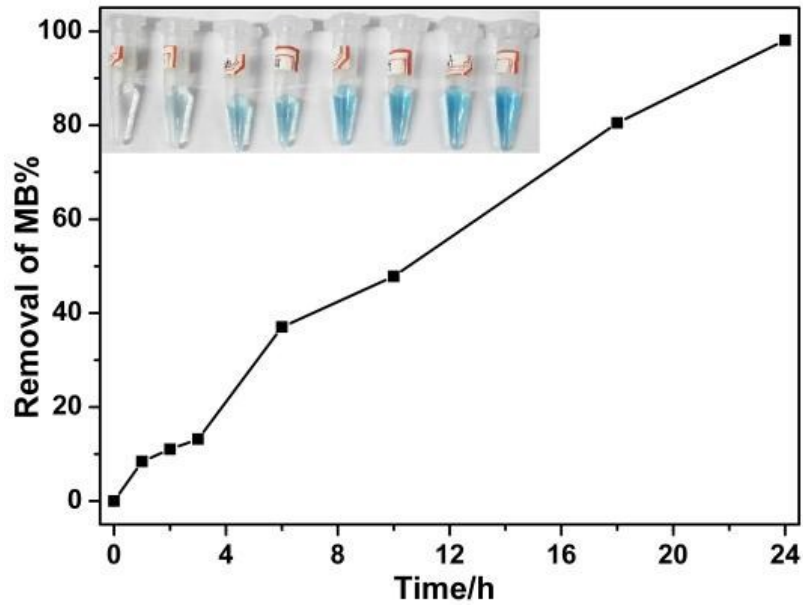

**Fig. S18.** Removal efficiency of MB over **CIAC-120**. The inset photos represent the color change of MB solutions upon adsorption by **CIAC-120**. Time increases in the order from the right to the left.

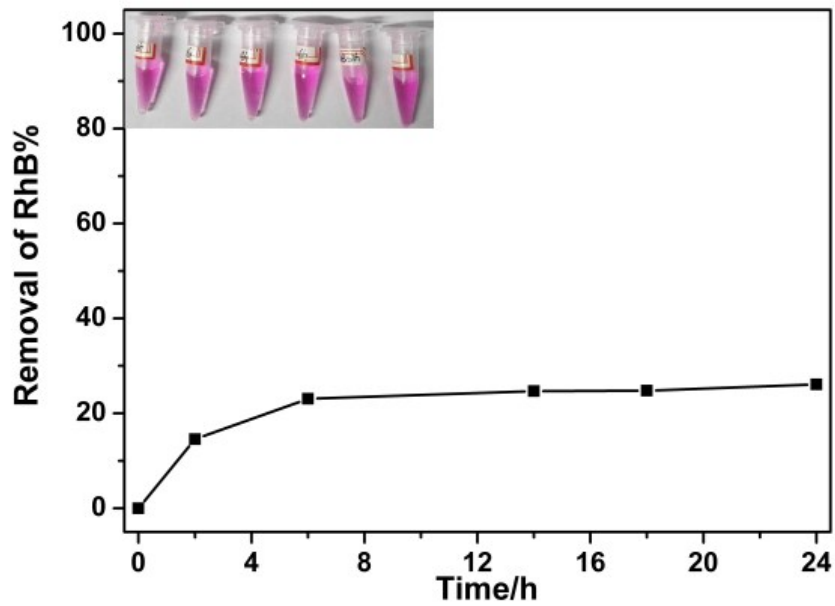

**Fig. S19.** Removal efficiency of RhB over **CIAC-120**. The inset photos represent the color change of RhB solutions upon adsorption by **CIAC-120**. Time increases in the order from the right to the left.

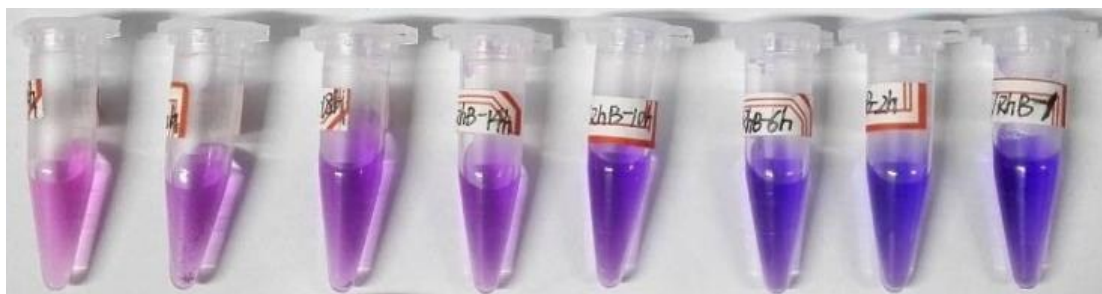

**Fig. S20.** Photographs of the color change of the mixed dyes MB/RhB solutions before and after adsorption experiments at given intervals with **CIAC-120**. Time increases in the order from the right to the left.

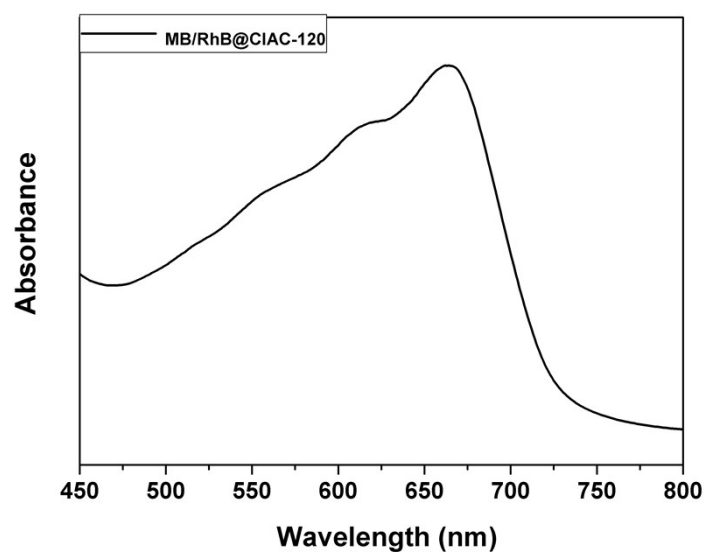

**Fig. S21** Solid-state UV-Vis spectra of **MB/RhB@CIAC-120**.

After dye adsorption in a mixture of MB and RhB (both being of 10 mg/L) for 24 hours, the samples of MB/RhB@CIAC-120 were collected by filtration, washed with H<sub>2</sub>O and CH<sub>3</sub>OH for three times, respectively, and dried in air. Then the samples were analyzed by a solid-state UV-Vis spectrophotometer. The characteristic absorption peak of MB was observed, but the characteristic absorption peak of RhB was not obvious, which indicates that MB is selectively adsorbed and encapsulated in the crystalline material.

**Table S1.** Crystal data and structure refinement for compounds **CIAC-117-CIAC-120** without the involved solvent molecules.

|                                    | <b>CIAC-117</b>                                                                                                   | <b>CIAC-118</b>                                                                                                   | <b>CIAC-119</b>                                                                                                                  | <b>CIAC-120</b>                                                                                                                  |
|------------------------------------|-------------------------------------------------------------------------------------------------------------------|-------------------------------------------------------------------------------------------------------------------|----------------------------------------------------------------------------------------------------------------------------------|----------------------------------------------------------------------------------------------------------------------------------|
| formula                            | C <sub>216</sub> H <sub>216</sub> N <sub>4</sub> O <sub>44</sub> S <sub>16</sub> Cl <sub>4</sub> Co <sub>16</sub> | C <sub>264</sub> H <sub>232</sub> N <sub>8</sub> O <sub>48</sub> S <sub>16</sub> Cl <sub>4</sub> Co <sub>16</sub> | C <sub>216</sub> H <sub>212</sub> N <sub>4</sub> O <sub>44</sub> F <sub>4</sub> S <sub>16</sub> Cl <sub>4</sub> Co <sub>16</sub> | C <sub>264</sub> H <sub>224</sub> N <sub>8</sub> O <sub>48</sub> F <sub>8</sub> S <sub>16</sub> Cl <sub>4</sub> Co <sub>16</sub> |
| formula wt                         | 5169.81                                                                                                           | 5882.20                                                                                                           | 5241.43                                                                                                                          | 6026.14                                                                                                                          |
| cryst. syst.                       | monoclinic                                                                                                        | Tetragonal                                                                                                        | monoclinic                                                                                                                       | Tetragonal                                                                                                                       |
| space group                        | C2/c                                                                                                              | I 4/m                                                                                                             | C2/c                                                                                                                             | I 4/m                                                                                                                            |
| a (Å)                              | 42.516(2)                                                                                                         | 30.1630(3)                                                                                                        | 42.6717(11)                                                                                                                      | 30.1442(3)                                                                                                                       |
| b (Å)                              | 28.4143(14)                                                                                                       | 30.1630(3)                                                                                                        | 26.3547(7)                                                                                                                       | 30.1442(3)                                                                                                                       |
| c (Å)                              | 33.6347(17)                                                                                                       | 21.6122(4)                                                                                                        | 33.6116(9)                                                                                                                       | 21.5579(5)                                                                                                                       |
| α (°)                              | 90.00                                                                                                             | 90.00                                                                                                             | 90.00                                                                                                                            | 90.00                                                                                                                            |
| β (°)                              | 111.972(2)                                                                                                        | 90.00                                                                                                             | 113.5760(10)                                                                                                                     | 90.00                                                                                                                            |
| γ (°)                              | 90.00                                                                                                             | 90.00                                                                                                             | 90.00                                                                                                                            | 90.00                                                                                                                            |
| V(Å <sup>3</sup> )                 | 37682(3)                                                                                                          | 19662.9(5)                                                                                                        | 34644.5(16)                                                                                                                      | 19589.1(5)                                                                                                                       |
| Z                                  | 4                                                                                                                 | 2                                                                                                                 | 4                                                                                                                                | 2                                                                                                                                |
| D <sub>c</sub> /g cm <sup>-3</sup> | 0.909                                                                                                             | 0.994                                                                                                             | 1.003                                                                                                                            | 1.021                                                                                                                            |
| μ / mm <sup>-1</sup>               | 6.799                                                                                                             | 6.578                                                                                                             | 7.418                                                                                                                            | 6.641                                                                                                                            |
| F(000)                             | 10544                                                                                                             | 6024                                                                                                              | 10672                                                                                                                            | 6152                                                                                                                             |
| total data                         | 11444                                                                                                             | 4033                                                                                                              | 12358                                                                                                                            | 4019                                                                                                                             |
| unique data                        | 8868                                                                                                              | 3702                                                                                                              | 10743                                                                                                                            | 3558                                                                                                                             |
| R <sub>int</sub>                   | 0.1214                                                                                                            | 0.0843                                                                                                            | 0.0613                                                                                                                           | 0.0508                                                                                                                           |
| GOF                                | 1.051                                                                                                             | 1.111                                                                                                             | 1.099                                                                                                                            | 1.133                                                                                                                            |
| R1 <sup>a</sup> [I > 2σ(I)]        | 0.0675                                                                                                            | 0.1102                                                                                                            | 0.0638                                                                                                                           | 0.0857                                                                                                                           |
| wR2 <sup>b</sup> (all data)        | 0.1967                                                                                                            | 0.3110                                                                                                            | 0.1543                                                                                                                           | 0.2780                                                                                                                           |

$$^a R1 = \frac{\sum ||F_o| - |F_c||}{\sum |F_o|}; \quad ^b wR2 = \left\{ \frac{\sum [w(F_o^2 - F_c^2)^2]}{\sum [w(F_o^2)^2]} \right\}^{1/2}$$
